1 **Title: Long-term Exposures to Air Pollutants Affect FeNO in Children: A Longitudinal**  
2 **Study**

3  
4 **Authors:** Yue Zhang, PhD<sup>1,2,3</sup>, Sandrah P. Eckel, PhD<sup>4</sup>, Kiros Berhane, PhD<sup>5</sup>, Erika Garcia,  
5 PhD<sup>4</sup>, Patrick Muchmore, PhD<sup>4</sup>, Noa Ben-Ari Molshatzki, PhD<sup>4</sup>, Edward B. Rappaport, MS<sup>4</sup>,  
6 William S. Linn, MA<sup>4</sup>, Rima Habre, ScD<sup>4</sup>, Frank D. Gilliland, MD, PhD<sup>4</sup>

7  
8 **Affiliations:**

9 <sup>1</sup> Department of Internal Medicine, University of Utah, Salt Lake City, UT, USA;  
10 <sup>2</sup> Department of Family and Preventive Medicine, University of Utah, Salt Lake City, UT, USA;  
11 <sup>3</sup> Veteran Affairs Salt Lake City Health Care System, Salt Lake City, UT, USA;  
12 <sup>4</sup> Department of Preventive Medicine, University of Southern California, Los Angeles, CA, USA;  
13 <sup>5</sup> Department of Biostatistics, University of Columbia, New York, NY, USA;

14  
15  
16 **Corresponding author contact information:**

17 Yue Zhang  
18 Division of Epidemiology  
19 Department of Internal Medicine  
20 University of Utah  
21 295 Chipeta Way  
22 Salt Lake City, UT, 84018  
23 E-mail: [zhang.yue@hsc.utah.edu](mailto:zhang.yue@hsc.utah.edu)  
24 Tel: 801-213-3735  
25 Fax: 801-581-3623

26  
27 **Funding:** National Institute of Health, Environmental Protection Agency, Hastings Foundation.  
28

29 **ABSTRACT**

30 Fractional exhaled nitric oxide (FeNO) is a marker of airway inflammation shown to be  
31 responsive to short-term air pollution exposures; however, effects of long-term exposures are  
32 uncertain. Using longitudinal assessments of FeNO and air pollutant exposures, we aimed to  
33 determine whether FeNO is a marker for chronic effects of air pollution exposures after  
34 accounting for short-term exposures effects.

35  
36 FeNO was assessed up to six times 2004-2012 in 3607 schoolchildren from 12 communities in  
37 the Southern California Children's Health Study. Within-community long-term ambient air  
38 pollution exposures (PM<sub>2.5</sub>, PM<sub>10</sub>, NO<sub>2</sub>, O<sub>3</sub>) were represented by differences between  
39 community-specific annual averages and the eight-year average spanning the study period.  
40 Linear mixed-effect models estimated within-participant associations of annual average air  
41 pollution with current FeNO, controlling for previous FeNO, prior seven-day average pollution,  
42 potential confounders, and community-level random intercepts. We considered effect  
43 modification by sex, ethnicity, asthma, and allergy at baseline.

44  
45 We found FeNO was positively associated with annual average air pollution, after accounting for  
46 short-term exposures. One standard deviation higher annual PM<sub>2.5</sub> and NO<sub>2</sub> exposures (PM<sub>2.5</sub>:2.0  
47 µg/m<sup>3</sup>; NO<sub>2</sub>:2.7 ppb) were associated, respectively, with 4.6% (95%CI:2.3%-6.8%) and 6.5%  
48 (95%CI:4.1%-8.9%) higher FeNO. These associations were larger among females. We found  
49 little evidence supporting association with PM<sub>10</sub> or O<sub>3</sub>.

50  
51 Annual average PM<sub>2.5</sub> and NO<sub>2</sub> levels were associated with FeNO in schoolchildren, adding new  
52 evidence that long-term exposure affects FeNO beyond the well-documented short-term effects.  
53 Longitudinal FeNO measurements may be useful as an early marker of chronic respiratory  
54 effects of long-term PM<sub>2.5</sub> and NO<sub>2</sub> exposures in children.

55

56 **Key messages**

- 57     • We show strong evidence that long-term exposures to air pollutants affect FeNO,  
58         independent of the well-documented associations with short-term exposures to air  
59         pollution  
60     • Longitudinal FeNO measurements may be useful as an early marker of chronic  
61         respiratory effects of long-term air pollution exposures in children.

62  
63 **Capsule summary**

64 Annual average PM<sub>2.5</sub> and NO<sub>2</sub> were associated with FeNO in schoolchildren, adding new  
65 evidence that long-term exposure affects FeNO beyond the well-documented short-term effects.  
66

67 **Key words:**

68 FeNO, pollution, particulate matter, nitrogen dioxide, children  
69

70 **Abbreviations**

71 ATS: American Thoracic Society

72 BMI: body mass index

73 CHS: Southern California Children's Health study

74 EC: elemental carbon

75 FeNO: Fractional exhaled nitric oxide

76 NO: Nitric oxide

77 NO<sub>2</sub>: Nitrogen dioxide

78 O<sub>3</sub>: Ozone

79 PM<sub>2.5</sub>: particulate matter with an aerodynamic diameter of 2.5 or less

80 PM<sub>10</sub>: particulate matter with an aerodynamic diameter of 10 µm or less

81 SHS: secondhand tobacco smoke  
82

## 83 INTRODUCTION

84 Breathing polluted air has a multitude of impacts on human health, many of which are thought to  
85 be driven by inflammatory mechanisms. The primary route of exposure is inhalation, thus the  
86 respiratory system is a major target organ for toxic effects as it receives the largest dose. The  
87 fractional concentration of exhaled nitric oxide (FeNO) is a marker of airway inflammation  
88 which has been shown to be useful for the assessment of acute respiratory effects of short-term  
89 exposure (hours to weeks) to ambient air pollutants,<sup>1-3</sup> including particulate matter with an  
90 aerodynamic diameter of 2.5 or 10  $\mu\text{m}$  or less (PM<sub>2.5</sub> and PM<sub>10</sub>, respectively), black smoke,  
91 elemental carbon (EC), nitrogen dioxide (NO<sub>2</sub>), and ultrafine particles. In the Southern  
92 California Children's Health study (CHS), we have reported positive cross-sectional associations  
93 of short-term average PM<sub>10</sub>, PM<sub>2.5</sub>, and ozone (O<sub>3</sub>) exposures in the week(s) before FeNO  
94 measurement with FeNO.<sup>4</sup>

95  
96 Currently, there is limited and inconsistent evidence for effects of longer-term air pollution  
97 exposures on FeNO. For example, a number of cross-sectional studies have related FeNO to  
98 either location-based proxies for long-term exposures to traffic/industrial activity or long-term  
99 (seasonal to annual average) ambient pollution. Some of these studies found significant positive  
100 associations<sup>5-7</sup> (two with adjustment for short-term exposures<sup>8,9</sup>) but others did not.<sup>10-15</sup> An early  
101 analysis of CHS data over a short follow-up period is one of the few studies to date relating  
102 longitudinally assessed FeNO to long-term ambient air pollution exposures. Using two  
103 assessments of FeNO approximately one year apart in ~1200 schoolchildren, we found that  
104 increased annual average PM<sub>2.5</sub> or NO<sub>2</sub> was associated with increased within-participant FeNO,  
105 after adjusting for short-term exposures (in the prior week).<sup>16</sup>

106  
107 We hypothesize that FeNO is affected by both long-term and short-term exposures to ambient air  
108 pollution. In this study, the estimand of interest is long-term ambient air pollution exposure  
109 effect, and short-term exposure is treated as nuisance parameter. We examined the full  
110 longitudinal CHS data—which includes up to six repeated FeNO assessments in more than 3000  
111 schoolchildren—to investigate whether long-term (i.e., annual average) ambient air pollution  
112 exposures are associated with within-participant changes in FeNO, after accounting for short-  
113 term (i.e., weekly average) exposures.

## 115 MATERIAL AND METHODS

### 116 Study Population

117 Participants in this study were part of the most recent southern California Children's Health  
118 Study (CHS) cohort, which started enrollment in 2002-2003 from kindergarten and first grade  
119 classrooms. Detailed information on study design, participant recruitment, and data collection  
120 has been reported previously.<sup>17</sup> This analysis includes 3607 school children aged 6-17 years from  
121 12 communities in Southern California, who had FeNO assessed up to 6 times in approximately  
122 annual visits from 2004-2005 through 2011-2012. Ethical approval of the protocol was obtained  
123 from the University of Southern California institutional review board (approval # HS-13-00150,  
124 continuing review date April 17, 2019). Informed assent was obtained for each child, and  
125 informed consent from a parent or guardian. The research protocol was reviewed and approved  
126 by the University of Southern California Health Campus Institutional Review Board.

### 127 FeNO measurement

129 FeNO was measured at schools following the American Thoracic Society (ATS) guidelines using  
130 an offline technique at the first two visits (2004-2005 and 2005-2006 school years) and online  
131 technique in the subsequent four visits. For offline measurement, breath was collected in  
132 aluminized Mylar bags using commercial breath sampling kits (Sievers Division, GE Analytical  
133 Instruments, Boulder, Colorado, USA). Each child took 2-3 initial deep breaths through the kit's  
134 NO scrubber followed by a near-vital-capacity breath and immediate controlled exhalation  
135 through the sampling kit. The collected bag samples were measured in central laboratory for  
136 FeNO level at targeted 100 ml/sec flow rate using a standard chemiluminescent analyzer system  
137 (Sievers Division). For online measurement, FeNO was measured directly using EcoMedics  
138 CLD-88-SP analyzers with DeNOx accessories to provide NO-free inhaled air (EcoPhysics Inc,  
139 Ann Arbor, MI, USA/Duernten, Switzerland). Each child was asked to provide at least three  
140 maneuvers at the target 50 ml/sec flow rate. The plateau concentration for each maneuver was  
141 taken from the 3 second plateau with the minimum NO coefficient of variation. FeNO was  
142 represented by the mean of two or three ATS acceptable plateaus that differed by less than 15%  
143 or 1 *ppb* where all ATS acceptable plateaus were less than 10 *ppb*. Offline FeNO data were  
144 converted to estimates of FeNO as would be measured online at 50 ml/sec expiratory flow. The  
145 conversion was performed using a statistical model determined in the post hoc comparison study,  
146 which involved 362 children measured on and off line in the same testing session. We exclude  
147 observations with reported use of inhaled corticosteroids. Details of FeNO data collection,  
148 quality control, and conversion procedures have been reported previously.<sup>18-20</sup>

#### 149 150 **Air Pollution Data**

151 Daily 24-hour average PM<sub>2.5</sub>, PM<sub>10</sub>, NO<sub>2</sub>, O<sub>3</sub> (10am-6pm only), and temperature data were  
152 obtained for the study period from central monitoring sites in each community operated by local  
153 air pollution agencies in conformance with US Environmental Protection Agency (EPA)  
154 requirements. For each pollutant, community-specific study period averages were computed (a  
155 seven-year average, from 2004/05-2011/12). For each pollutant and each participants' FeNO test  
156 date, annual average pollution was calculated based on the 12 months preceding the test date in  
157 that participant's community. Weekly averages were calculated based on the 7 days preceding  
158 the test date. Air pollution data was interpolated to fill in data gaps on days with missing  
159 exposure using modeled predictions based on data from nearby monitors. While such processes  
160 could be potential sources of bias, previous sensitivity analyses on CHS data that limited use to  
161 complete data have not altered main study findings.<sup>4</sup> The primary "long-term" exposure of  
162 interest for this study was the annual within-community fluctuation, defined as the difference  
163 between annual averages and the seven year average concentration for each community. We  
164 refer to seven day average as "short-term" exposures hereafter.

#### 165 166 **Other Covariates**

167 Race/ethnicity, medication use, current wheeze status, exposure to secondhand tobacco smoke  
168 (SHS), asthma history, and allergy history were determined from annual self-administered  
169 questionnaires. Questionnaires were completed by parents from baseline to year 2006-2007, and  
170 by children from follow-up year 2007-2008 onwards. Questionnaires were collected at the school  
171 visit during which the child's FeNO test was performed. Ambient air nitric oxide was measured  
172 at the time of FeNO collection. Trained technicians measured height and weight at every FeNO  
173 test date following a standardized protocol. Age- and sex-specific body mass index (BMI)

174 percentiles were calculated based on the Centers for Disease Control and Prevention BMI growth  
175 charts<sup>21</sup>.

176

### 177 **Statistical Analysis**

178 FeNO had a right-skewed distribution, so we used geometric mean and geometric standard  
179 deviation to quantify central tendency and dispersion and performed all analyses with natural  
180 log-transformed FeNO. In descriptive data analyses, we summarized the characteristics of the  
181 study participants, compared the distribution of baseline year log FeNO by these characteristics,  
182 and also summarized the distribution of the community-specific seven-year pollutant averages  
183 and the annual within-community fluctuations. We also calculated Pearson correlation  
184 coefficients of annual within-community fluctuations between pairs of pollutants.

185

186 We estimated linear mixed effect models to examine the association of log FeNO with annual  
187 within-community fluctuations in air pollution, adjusting for short-term exposures, confounders,  
188 and design variables as well as log FeNO at the previous visit. More details on the model  
189 specification could be found in the Supplementary appendix. Potential confounders included sex,  
190 race/ethnicity, and respiratory allergy at baseline, as well as time-varying measures of asthma  
191 status, medication use, current wheeze, secondhand tobacco smoke exposure, recent respiratory  
192 illness, concurrent room air nitric oxide, month of FeNO test, and average temperature in the  
193 week preceding the FeNO test. To assess confounding, we used the analytic change-in-estimate  
194 ( $\geq 10\%$ ) criterion. We also evaluated whether long-term exposure associations were modified by:  
195 baseline asthma, baseline allergy, sex, and ethnicity. In sensitivity analyses, the final models  
196 were refitted by: (a) removing the five communities which contributed to only the first four (of  
197 six) FeNO visits, (b) removing one community at a time, (c) adding a community-level random  
198 slope on long-term exposure to investigate potential heterogeneity by community, (d) subsetting  
199 to only online FeNO collection (the last four of the six visits), or (e) accounting for the serial  
200 correlation of FeNO observations from same participant by using an autoregressive within-  
201 participant level random component instead of controlling for previous visit log FeNO. In all  
202 models, missing data were assumed to be missing at random. All analyses were conducted using  
203 the statistical package R version 3.5.1<sup>22</sup>. Hypothesis tests were performed under a 0.05  
204 significance level and a two-sided alternative.

205

### 206 **RESULTS**

207 The 3607 children, with mean age 9 at baseline, were evenly distributed by sex (male: 49.7%),  
208 primarily Hispanic (56.3%) or non-Hispanic White (33.2%), 41.5% had allergies, 15.1% had  
209 asthma, and 3% had reported a recent respiratory illness (Table 1). At baseline, the geometric  
210 mean FeNO was 12.1 ppb (geometric SD: 1.9 ppb) and baseline FeNO was statistically  
211 significantly associated with most participant characteristics. Specifically, boys on average had  
212 significantly higher FeNO than girls (p-value=0.015). FeNO differed by race/ethnicity (p-value  
213 <0.001), with African American children having higher FeNO than the other race/ethnicity  
214 groups. Children with respiratory conditions, such as asthma, wheeze, allergy, and recent  
215 respiratory illness, had statistically significantly higher FeNO than those without (p-values all  
216 <0.001). FeNO was positively associated with age and height (p-value <0.001), but not BMI (p-  
217 value=0.831). FeNO varied by month of collection (p-value<0.001), with the lowest geometric  
218 means in cooler months (December – March).

219

220  
221  
222  
223

**Table 1: Summary of Participant Characteristics and FeNO at Baseline (N=3607)**

| Variable            | Category           | N (%)       | Geometric mean FeNO (GSD)* | p-value† |
|---------------------|--------------------|-------------|----------------------------|----------|
| Sex                 | Male               | 1792 (49.7) | 12.4 (2.0)                 | 0.015    |
|                     | Female             | 1815 (50.3) | 11.9 (1.9)                 |          |
| Race/ethnicity      | Non-Hispanic White | 1193 (33.2) | 11.4 (1.8)                 | <0.001   |
|                     | Hispanic           | 2022 (56.3) | 12.4 (1.9)                 |          |
|                     | African American   | 122 (3.4)   | 15.5 (2.2)                 |          |
|                     | Asian              | 173 (4.8)   | 11.2 (1.9)                 |          |
|                     | Other              | 82 (2.3)    | 14.2 (2.1)                 |          |
| ETS                 | Yes                | 174 (5.2)   | 13.1 (2.0)                 | 0.181    |
|                     | No                 | 3207 (94.8) | 12.0 (1.9)                 |          |
| Allergy             | Yes                | 1292 (41.5) | 13.6 (2.0)                 | <0.001   |
|                     | No                 | 1820 (58.5) | 11.3 (1.8)                 |          |
| Age                 | <=9                | 2443 (67.7) | 11.2 (1.8)                 | <0.001   |
|                     | >9                 | 1164 (32.3) | 14.3 (2.0)                 |          |
| Height              | <=132cm            | 1947 (54.3) | 11.4 (1.8)                 | <0.001   |
|                     | >132cm             | 1638 (45.7) | 13.1 (2.0)                 |          |
| Asthma              | Yes                | 546 (15.1)  | 16.3 (2.3)                 | <0.001   |
|                     | No                 | 3060 (84.9) | 11.5 (1.8)                 |          |
| Medication Use      | Yes                | 299 (9.4)   | 17.2 (2.3)                 | <0.001   |
|                     | No                 | 2896 (90.6) | 11.6 (1.8)                 |          |
| Wheeze              | Yes                | 368 (10.9)  | 16.6 (2.2)                 | <0.001   |
|                     | No                 | 2995 (89.1) | 11.6 (1.9)                 |          |
| BMI                 | <=75%              | 1803 (50.3) | 12.1 (1.9)                 | 0.831    |
|                     | >75%               | 1781 (49.7) | 12.1 (1.9)                 |          |
| Month               | Jan                | 319 (8.8)   | 10.8 (2.0)                 | <0.001   |
|                     | Feb                | 554 (15.4)  | 11.0 (1.8)                 |          |
|                     | Mar                | 678 (18.8)  | 11.7 (1.9)                 |          |
|                     | Apr                | 629 (17.4)  | 13.6 (1.9)                 |          |
|                     | May                | 323 (9.0)   | 14.4 (1.9)                 |          |
|                     | Jun                | 367 (10.2)  | 13.7 (1.9)                 |          |
|                     | Oct                | 117 (3.2)   | 13.1 (1.8)                 |          |
|                     | Nov                | 250 (6.9)   | 12.1 (1.8)                 |          |
|                     | Dec                | 370 (10.3)  | 10.1 (2.0)                 |          |
|                     | Room air NO        | <=5         | 1831 (50.8)                |          |
| >5                  |                    | 1775 (49.2) | 11.0 (1.9)                 |          |
| Respiratory Illness | Yes                | 82 (3.0)    | 15.4 (2.1)                 | <0.001   |
|                     | No                 | 2631 (97)   | 11.8 (1.9)                 |          |

\*: Results based on geometric means (GM) and geometric standard deviations (GSD) due to skewness of FeNO data.

†: p-values are based on t-tests for comparisons of natural log-transformed FeNO levels across categories (not



including missing category).

224  
 225 Community-specific seven-year average air pollution concentrations ranged approximately two  
 226 to three-fold across the 12 communities (Table 2). Most communities experienced a downward  
 227 trend in annual average PM<sub>2.5</sub> and NO<sub>2</sub> over the study period (Figure 1), which was a major  
 228 source of variation in the annual within-community fluctuations for these pollutants. The  
 229 standard deviation of annual within-community fluctuations was 2.0 µg/m<sup>3</sup> for PM<sub>2.5</sub>, 6.7  
 230 µg/m<sup>3</sup> for PM<sub>10</sub>, 2.7 ppb for NO<sub>2</sub>, and 2.5 ppb for O<sub>3</sub> (Table 2). As shown in Table 3, PM<sub>2.5</sub> and  
 231 PM<sub>10</sub> had the highest correlation in seven-year averages across-communities (Pearson’s R=0.81),  
 232 while PM<sub>2.5</sub> and NO<sub>2</sub> had the largest correlation in annual within-community fluctuations  
 233 (Pearson’s R=0.64) and annual within-community fluctuations of O<sub>3</sub> were negatively correlated  
 234 with the other pollutants. Log FeNO was correlated with log FeNO at the previous visit  
 235 (Pearson’s R=0.65), indicating moderately strong first order autocorrelation.

236  
 237

**Table 2: Distribution of the 7-year Average Air Pollutant Concentrations and Annual Within-Community Fluctuation across 12 Communities**

| Pollutant <sup>#</sup>                | 7-year Average |           | Annual Within-Community Fluctuation |            |
|---------------------------------------|----------------|-----------|-------------------------------------|------------|
|                                       | Mean (SD)      | Min-Max   | Mean (SD)                           | Min-Max    |
| PM <sub>2.5</sub> , µg/m <sup>3</sup> | 12.9 (3.8)     | 6.8-19.4  | 0.1 (2.0)                           | -3.8-4.8   |
| PM <sub>10</sub> , µg/m <sup>3</sup>  | 32.0 (8.3)     | 22.5-52.7 | 2.1 (6.7)                           | -10.2-23.3 |
| NO <sub>2</sub> , ppb                 | 16.7 (6.3)     | 6.7-25.6  | -0.1 (2.7)                          | -7.2-5.7   |
| O <sub>3</sub> , ppb                  | 45.1 (8.4)     | 30.7-56.6 | -0.1 (2.5)                          | -6.1-7.7   |

<sup>#</sup>: All pollutants are 24 hr average, except for ozone (10am–6pm average).

238  
 239  
 240

**Table 3: Pearson Correlation Coefficients of Annual Within-Community Fluctuation in Air Pollution (lower triangular matrix) and 7-year average air pollutant concentrations (upper triangular matrix).**

| Pollutant <sup>#</sup> | PM <sub>2.5</sub> | PM <sub>10</sub> | NO <sub>2</sub> | O <sub>3</sub> |
|------------------------|-------------------|------------------|-----------------|----------------|
| PM <sub>2.5</sub>      | 1                 | 0.81             | 0.75            | 0.2            |
| PM <sub>10</sub>       | 0.55              | 1                | 0.29            | 0.31           |
| NO <sub>2</sub>        | 0.64              | 0.37             | 1               | -0.02          |
| O <sub>3</sub>         | -0.41             | -0.55            | -0.43           | 1              |

\*: P-value < 0.05

<sup>#</sup>: All pollutants are 24 hr average, except for ozone (10am–6pm average).

241  
 242



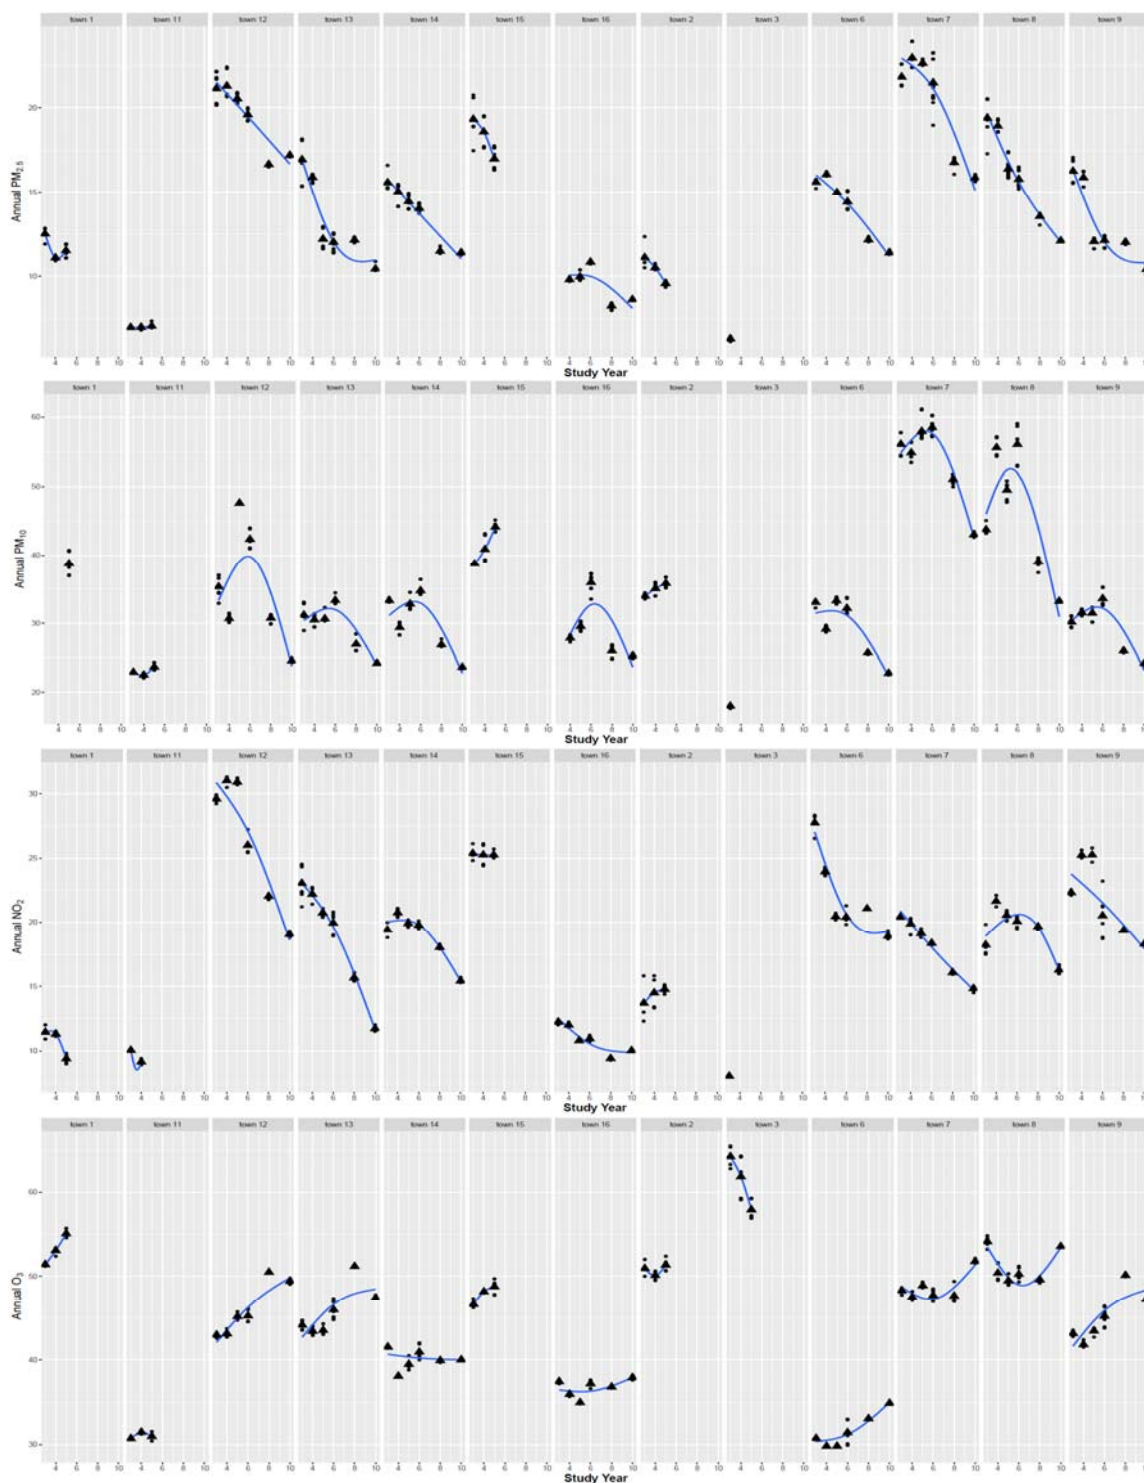

243  
 244 **Figure 1: Community-specific annual average air pollution during the study period.**  
 245 Note: 1=Alpine; 2=Lake Elsinore; 3=Lake Gregory; 6=Long Beach; 7=Mira Loma; 8=Riverside; 9=San Dimas;  
 246 11=Santa Maria; 12=Upland; 13=Glendora; 14=Anaheim; 15=San Bernardino; 16=Santa Barbara. Study  
 247 Year 3=2004-2005; Study Year 4=2005-2006; Study Year 5=2006-2007; Study Year 6=2007-2008; Study  
 248 Year 7=2008-2009; Study Year 8=2009-2010; Study Year 9=2010-2011; Study Year 10=2011-2012; The dot  
 249 points are the annual average air pollution level prior to the dates of FeNO measurement, and triangle

250 points are the annual average air pollution level at each study year. The curve lines are the fitted trends  
 251 of annual average air pollution level across the study years for each community.  
 252 Long-term exposures to PM<sub>2.5</sub> and NO<sub>2</sub> were positively associated with within-person changes in  
 253 FeNO, after adjustment for covariates and short-term exposure (Table 4). A one SD (2.0 µg/m<sup>3</sup>)  
 254 increase in the annual within-community fluctuation of PM<sub>2.5</sub> was associated with a 4.6% within-  
 255 participant increase in FeNO (95% CI: 2.3%-6.8%), controlling for covariates including FeNO at  
 256 the previous visit and seven-day average PM<sub>2.5</sub>. Similarly, a one SD (2.7 ppb) increase in the  
 257 annual within-community fluctuation of NO<sub>2</sub> was associated with a 6.5% within-participant  
 258 increase in FeNO (95% CI: 4.1%-8.9%), controlling for covariates. We found no evidence for an  
 259 association of long-term PM<sub>10</sub> and FeNO. Long-term O<sub>3</sub> was negatively associated with FeNO in  
 260 the primary analysis, but this association was attenuated and no longer statistically significant in  
 261 sensitivity analyses (Tables 1S and 2S). All models were adjusted for sex, race, respiratory  
 262 allergy, asthma, medication use, wheeze, secondhand tobacco smoking, recent respiratory illness,  
 263 room air nitric oxide, month, temperature, and short-term exposure of air pollution.  
 264

**Table 4: Adjusted\* percent difference in FeNO associated with a one standard deviation (SD)<sup>†</sup> increase in long-term air pollution exposures<sup>‡</sup>**

| Pollutant         | Percent difference in FeNO (95% CI) |
|-------------------|-------------------------------------|
| PM <sub>2.5</sub> | 4.55 (2.33, 6.82)                   |
| PM <sub>10</sub>  | 0.63 (-1.88, 3.21)                  |
| NO <sub>2</sub>   | 6.46 (4.08, 8.9)                    |
| O <sub>3</sub>    | -2.62 (-4.49, -0.71)                |

\* Models adjusted for: sex, race, respiratory allergy, asthma, medication use, wheeze, secondhand tobacco smoking, recent respiratory illness, room air nitric oxide, month, temperature, prior 7 day average of the same pollutant, and natural log-transformed FeNO at the previous visit.

<sup>†</sup> Long-term exposures are annual within-community fluctuations, calculated as the difference between annual air pollutant concentration and seven-year average concentration.

<sup>‡</sup>SDs are: 2.0 µg/m<sup>3</sup> for PM<sub>2.5</sub>, 6.7 µg/m<sup>3</sup> for PM<sub>10</sub>, 2.7 ppb for NO<sub>2</sub> and 2.5 ppb for O<sub>3</sub>.

265  
 266  
 267 There was evidence that the associations of long-term PM<sub>2.5</sub> and NO<sub>2</sub> with FeNO varied by sex,  
 268 with larger estimated associations in females (interaction p-values: 0.007 for PM<sub>2.5</sub> and 0.066 for  
 269 NO<sub>2</sub>) (Table 5). In sensitivity analyses (Supplementary Table 1), we still observed statistically  
 270 significant positive associations of long-term PM<sub>2.5</sub> and NO<sub>2</sub> with FeNO after: (a) removing the  
 271 five communities followed only through four years, (b) removing one community at a time  
 272 (Supplementary Table 2), and (c) taking out the adjustment for short-term air pollution, though  
 273 we did observe some heterogeneity in the associations.  
 274

275

**Table 5: Interaction Tests\* on the Effects of Annual Within-Community Fluctuation in Air Pollutants# on FeNO level**

| Effect Modifier     |        | PM <sub>2.5</sub><br>% diff/Unit (95% CI) | PM <sub>10</sub><br>% diff/Unit (95% CI) | NO <sub>2</sub><br>% diff/Unit (95% CI) | O <sub>3</sub><br>% diff/Unit (95% CI) |
|---------------------|--------|-------------------------------------------|------------------------------------------|-----------------------------------------|----------------------------------------|
| Sex                 | Female | 3.1 (1.8,4.3)                             | 0.2 (-0.2,0.6)                           | 2.7 (1.8,3.6)                           | -1.0 (-1.9,-0.2)                       |
|                     | Male   | 1.4 (0.1,2.6)                             | -0.1 (-0.5,0.4)                          | 1.8 (0.8,2.9)                           | -1.1 (-2.0,-0.1)                       |
| Interaction P-value |        | 0.007                                     | 0.143                                    | 0.066                                   | 0.957                                  |
| Asthma              | No     | 2.4 (1.2,3.5)                             | 0.1 (-0.3,0.5)                           | 2.4 (1.5,3.2)                           | -1.0 (-1.8,-0.2)                       |
|                     | Yes    | 1.1 (-1.1,3.4)                            | -0.2 (-0.9,0.5)                          | 2.3 (0.7,3.9)                           | -1.1 (-2.8,0.5)                        |
| Interaction P-value |        | 0.249                                     | 0.288                                    | 0.919                                   | 0.899                                  |
| Allergy             | No     | 2.6 (1.3,3.9)                             | 0.1 (-0.3,0.6)                           | 2.5 (1.5,3.5)                           | -1.3 (-2.2,-0.4)                       |
|                     | Yes    | 2.1 (0.7,3.6)                             | 0.1 (-0.4,0.5)                           | 2.1 (1.1,3.2)                           | -1.5 (-2.5,-0.5)                       |
| Interaction P-value |        | 0.491                                     | 0.753                                    | 0.471                                   | 0.731                                  |
| Hispanic            | No     | 2.4 (1.0,3.7)                             | -0.1 (-0.5,0.4)                          | 2.2 (1.3,3.1)                           | -1.4 (-2.3,-0.6)                       |
|                     | Yes    | 2.2 (1.0,3.4)                             | 0.2 (-0.2,0.6)                           | 2.6 (1.5,3.7)                           | -0.6 (-1.5,0.4)                        |
| Interaction P-value |        | 0.799                                     | 0.232                                    | 0.420                                   | 0.083                                  |

\*: Annual Within-community Fluctuation: The difference between annual air pollutant concentration and 7-year average concentration (within-communities). All models adjusted for sex, race, respiratory allergy, asthma, medication use, wheeze, secondhand tobacco smoking, recent respiratory illness, room air nitric oxide, month, temperature, and air pollution level in the prior week.

#: All pollutants are 24 hr average, except for ozone (10am–6pm average).

276

277

## 278 DISCUSSION

279 In a large, prospective cohort study of schoolchildren in 12 Southern California communities, we  
 280 found statistically significant positive associations of FeNO—assessed longitudinally over an  
 281 eight-year period—with within-community fluctuations in annual average PM<sub>2.5</sub> and NO<sub>2</sub> after  
 282 adjusting for prior week exposure, previous visit FeNO, and confounders. This provides the  
 283 strong evidence that long-term exposures to air pollutants affect FeNO, independent of the well-  
 284 documented associations with short-term exposures to air pollution.

285 Results of this longitudinal study (using all six FeNO visits in the CHS) are consistent with a  
 286 preliminary longitudinal analysis of CHS data (using only the first two online FeNO  
 287 assessments),<sup>16</sup> which had found *within-participant* associations of long-term PM<sub>2.5</sub> and NO<sub>2</sub>  
 288 (but not PM<sub>10</sub> or O<sub>3</sub>) with FeNO while adjusting for short-term exposure. The preliminary CHS  
 289 study had targeted within-participant changes in FeNO using a different but complementary  
 290 statistical approach in which the change in FeNO was modeled as a function of the change in  
 291 annual average air pollution.<sup>16</sup> When studying FeNO, it is important to consider within-  
 292 participant changes over time from longitudinally collected data, given the considerable  
 293 unexplained across-participant heterogeneity in FeNO typically observed in cross-sectional  
 294 studies (e.g., R<sup>2</sup><0.3).<sup>23</sup> Indeed, in our data we observed moderately strong autocorrelation in

295 FeNO indicating relatively stable within-person FeNO. As an additional example, in 158  
296 asthmatic adults, the intraclass correlation of FeNO over one year was 0.73, with low baseline  
297 FeNO tending to stay low and higher baseline FeNO tending to stay high, but with more  
298 variability.<sup>24</sup> To our knowledge, the only other study relating longitudinally assessed FeNO to  
299 long-term air pollution exposures found positive but non-statistically-significant associations of  
300 FeNO (measured twice over six months in 130 children) with seasonal black carbon levels at  
301 subjects' residence (estimated by land-use regression), even after adjusting for short-term  
302 exposures (2 hour, 24 hour, or 7 day average black carbon from central site monitors).<sup>25</sup> This  
303 study's statistical analysis did not fully target within-participant associations since it used linear  
304 mixed models with a participant-level random intercept but did not decompose time-varying  
305 exposures ( $X_{ij}$ ) into within- and between-person terms (i.e.,  $X_{ij}-\bar{X}_i$  and  $\bar{X}_i$ ).<sup>26</sup>  
306 A number of cross-sectional studies have related FeNO to long-term (seasonal to annual average)  
307 ambient pollution or location-based proxies for long-term exposures to traffic/industrial activity.  
308 By design, these studies can estimate only between-participant associations of exposures with  
309 FeNO and hence are subject to the limitations of this approach. Some cross-sectional studies  
310 provide evidence supporting long-term exposure effects. In 241 healthy, full-term infants,  
311 prenatal average NO<sub>2</sub> from a central monitoring site was associated with increased FeNO  
312 measured during sleep at five weeks of age, even after adjusting for mean NO<sub>2</sub> in the 2 days  
313 prior to the FeNO test or residential distance to major road.<sup>9</sup> Two studies relating FeNO to  
314 proximity to industrial activity found FeNO to be elevated in children living closer to oil  
315 refinery/petrochemical activity<sup>6</sup> and in children attending schools closer to a steel mill,<sup>7</sup> though  
316 neither study adjusted for short-term air pollution exposures. Three studies<sup>5, 8, 27</sup> found a similar  
317 magnitude positive association between a proxy measure for traffic exposure (length of road in a  
318 circular buffer around the home), with the strongest associations for the smallest buffers around  
319 the home. While the length of road traffic exposure proxy likely represents both long- and short-  
320 term exposures, one of these studies adjusted for short-term exposure (central site 24 hour  
321 average ambient pollution) and found the length of road association to be robust to the  
322 adjustment,<sup>8</sup> suggesting a long-term exposure effect. Other cross-sectional studies have found no  
323 evidence for long-term exposure effects, perhaps due to exposure metrics relying on spatial  
324 variation which are not sensitive to traffic sources on smaller, local roads (e.g., land-use  
325 regression predicted seasonal or annual averages,<sup>14, 15, 25</sup> traffic counts,<sup>10, 13</sup> or distance to major  
326 road<sup>11, 13</sup>) or too few locations with high/low exposure to separate the source of interest from  
327 potential confounders.<sup>12</sup>  
328 Many study communities observed declines in annual average PM<sub>2.5</sub> and NO<sub>2</sub> during the study  
329 period. These declines were a key source of the variation in our long-term exposure metric  
330 (within-community annual fluctuations, calculated as the difference between annual averages  
331 and the seven-year average concentration for each community). Our standard interpretation of  
332 the observed positive associations as “percent *increase* in FeNO per SD *increase* in exposure”  
333 (e.g., 6.5% increase in FeNO (95% CI: 4.1%-8.9%) per 2.7 ppb increase in long-term NO<sub>2</sub>),  
334 could alternatively be reformulated as a “percent *decrease* in FeNO per SD *decrease* in  
335 exposure”. For example, scaled to an observed declines, in Glendora annual average NO<sub>2</sub>  
336 decreased by 11.3 ppb over the study period, and we estimated a 30% *decrease* in FeNO (95%  
337 CI: 18.2% to 42.9%) per 11.3 ppb *decrease* in long-term NO<sub>2</sub>). A number of studies have used  
338 natural or designed experiments to demonstrate that FeNO decreased following decreasing  
339 (primarily short-term) exposures. For example, following the adoption of clean fuel/technology  
340 school buses, 10-30% reductions in FeNO were observed in 275 schoolchildren.<sup>28</sup> Following

341 dramatic drops in air pollution in response to anti-air pollution measures enacted for the Beijing  
342 Olympics, FeNO decreased ~57% in 125 health young adults (and subsequently rose 135% after  
343 the games)<sup>3</sup> and ~27% in 36 children.<sup>29</sup> Within-participant FeNO also declined in a group of 42  
344 retired teachers relocated from a higher air pollution city to a lower pollution city for 9 days<sup>30</sup>  
345 and in 37 untreated allergic children moved from an urban to a rural environment for 7 days,  
346 with the reductions in FeNO restricted to participants with the highest FeNO at baseline in the  
347 urban environment.<sup>31</sup>

348 Several additional results in our study merit further discussion. We found evidence for larger  
349 effects of long-term PM<sub>2.5</sub> and NO<sub>2</sub> in females as compared to males (p=0.007 and 0.07,  
350 respectively), but no evidence for effect modification by asthma or allergy. In the preliminary  
351 CHS analysis of long-term air pollution effects on FeNO, we had found no evidence for effect  
352 modification by sex.<sup>16</sup> Sex/gender differences have been observed previously in air pollution  
353 epidemiology analyses, generally with larger effects for boys in early life and girls/women in  
354 later childhood and older age.<sup>32</sup> We also found a statistically significant negative association for  
355 long-term O<sub>3</sub>, which was not robust to our various sensitivity analyses. Within-community  
356 annual average O<sub>3</sub> was negatively correlated with PM<sub>2.5</sub>, PM<sub>10</sub>, and NO<sub>2</sub> and unlike those  
357 pollutants, there were trends of increasing O<sub>3</sub> during the study period. Finally, the association of  
358 long-term NO<sub>2</sub> with FeNO was larger in magnitude when leaving out one community (Upland)  
359 or including a community-level random slope. Upland had the highest annual average NO<sub>2</sub> at the  
360 beginning of the study period, and one of the largest declines over the study period.

361 This study has several strengths, including: a large ethnically diverse population-based cohort of  
362 schoolchildren; prospective longitudinal assessment of FeNO (up to 6 measurements over an  
363 eight year period); a Southern California study location with substantial within- and between-  
364 community variation in ambient air pollution exposures during the study period, representative  
365 of the range observed nationally in the United States; as well as a study design and statistical  
366 analyses approach that allowed us to target within-person associations of long-term air pollution  
367 and FeNO (automatically controlling for time-constant confounders) while adjusting for short-  
368 term air pollution exposures.

369 This study has several limitations. The method for FeNO assessment changed during the study  
370 period, as technology improved (offline assessment used for the first two FeNO visits and online  
371 assessment used for the next four FeNO visits). Although the offline values were converted to  
372 predicted online values based on a published internally-developed prediction model with an  $R^2 =$   
373 0.94<sup>33</sup>, there remains a possibility that this change in breath collection technique may have  
374 impacted our effect estimates. In a sensitivity analysis restricting to only online FeNO visits, the  
375 association of long-term NO<sub>2</sub> with FeNO remained similar and statistically significant (though  
376 with wider confidence intervals because of smaller sample size) and the association of long-term  
377 PM<sub>2.5</sub> with FeNO was still positive, but attenuated and no longer statistically significant. A  
378 limitation of our study design is that FeNO was assessed in only the most recent CHS cohort,  
379 allowing only for investigation of associations with within-community fluctuations in annual  
380 average air pollution. We were unable to investigate associations of within-community  
381 fluctuations in multi-year averages. Previous high impact CHS publications have taken  
382 advantage of multiple CHS cohorts (with staggered recruitment over time from the same  
383 communities) to demonstrate that, in the same communities, declines in long-term (multi-year)  
384 average air pollution have been associated with improved lung function growth,<sup>34</sup> reduced  
385 bronchitic symptoms,<sup>35</sup> and reduced asthma incidence.<sup>36</sup> However, the most recent CHS cohort



386 was still recruited from multiple cities, with a wide range of annual average ambient air pollution  
387 levels at baseline and differing trends over the course of the study period.

388  
389 In conclusion, our findings provide the strongest evidence to date that long-term PM<sub>2.5</sub> and NO<sub>2</sub>  
390 exposures affect within-participant FeNO, independent of the effects of short-term exposures,  
391 even during a study period with declining pollution levels. Longitudinal FeNO measurements  
392 may be useful as an early marker of chronic respiratory effects of long-term air pollution  
393 exposures in children.

394  
395 **Acknowledgements**

396 This work was supported by the Office of the Director of the National Institutes of Health  
397 (UG3OD023287 and UG3OD023249); the National Institutes of Environmental Health Sciences  
398 (grant # R01ES023262, R01ES027860); the Southern California Environmental Health Sciences  
399 Center (grant # P30ES007048) funded by the National Institute of Environmental Health  
400 Sciences; the Children's Environmental Health Center (grant #s P01ES009581, R826708-01 and  
401 RD831861-01) funded by the National Institute of Environmental Health Sciences and the  
402 Environmental Protection Agency; the Maternal and Developmental Risks from Environmental  
403 and Social Stressors (MADRES) Center (grant #s P50ES026086, 83615801-0) funded by the  
404 National Institute of Environmental Health Sciences, the National Institute for Minority Health  
405 and Health Disparities and the Environmental Protection Agency and the Hastings Foundation.  
406 We are indebted to the school principals, teachers, students and parents in each of the study  
407 communities for their cooperation and especially to the members of the field team for their  
408 efforts.

409

410 **REFERENCES**

- 411
- 412 1. La Grutta S, Ferrante G, Malizia V, Cibella F, Viegi G. Environmental effects on  
413 fractional exhaled nitric oxide in allergic children. *J Allergy (Cairo)* 2012; 2012:916926.
  - 414 2. Scarpa MC, Kulkarni N, Maestrelli P. The role of non-invasive biomarkers in detecting  
415 acute respiratory effects of traffic-related air pollution. *Clin Exp Allergy* 2014; 44:1100-  
416 18.
  - 417 3. Huang W, Wang G, Lu SE, Kipen H, Wang Y, Hu M, et al. Inflammatory and oxidative  
418 stress responses of healthy young adults to changes in air quality during the Beijing  
419 Olympics. *Am J Respir Crit Care Med* 2012; 186:1150-9.
  - 420 4. Berhane K, Zhang Y, Linn WS, Rappaport EB, Bastain TM, Salam MT, et al. The effect  
421 of ambient air pollution on exhaled nitric oxide in the Children's Health Study. *Eur*  
422 *Respir J* 2011; 37:1029-36.
  - 423 5. Eckel SP, Berhane K, Salam MT, Rappaport EB, Linn WS, Bastain TM, et al. Residential  
424 traffic-related pollution exposures and exhaled nitric oxide in the children's health study.  
425 *Environ Health Perspect* 2011; 119:1472-7.
  - 426 6. Rusconi F, Catelan D, Accetta G, Peluso M, Pistelli R, Barbone F, et al. Asthma  
427 symptoms, lung function, and markers of oxidative stress and inflammation in children  
428 exposed to oil refinery pollution. *J Asthma* 2011; 48:84-90.
  - 429 7. Acat M, Aydemir Y, Turğut M, Çörtük M, Çakar M, Yaşar Z, et al. Comparison of the  
430 Fractional Exhaled Nitric Oxide Levels in Adolescents at Three Schools Located Three  
431 Different Distances from a Large Steel Mill. *Can Respir J* 2017; 2017.
  - 432 8. Dales R, Wheeler A, Mahmud M, Frescura AM, Smith-Doiron M, Nethery E, et al. The  
433 influence of living near roadways on spirometry and exhaled nitric oxide in elementary  
434 schoolchildren. *Environ Health Perspect* 2008; 116:1423-7.
  - 435 9. Latzin P, Röösli M, Huss A, Kuehni CE, Frey U. Air pollution during pregnancy and  
436 lung function in newborns: a birth cohort study. *Eur Respir J* 2009; 33:594-603.
  - 437 10. Cakmak S, Mahmud M, Grgicak-Mannion A, Dales RE. The influence of neighborhood  
438 traffic density on the respiratory health of elementary schoolchildren. *Environ Int* 2012;  
439 39:128-32.
  - 440 11. Brown MS, Sarnat SE, DeMuth KA, Brown LAS, Whitlock DR, Brown SW, et al.  
441 Residential proximity to a major roadway is associated with features of asthma control in  
442 children. *PLoS One* 2012; 7:e37044.
  - 443 12. Spencer-Hwang R, Soret S, Ghamsary M, Rizzo N, Baum M, Juma D, et al. Gender  
444 Differences in Respiratory Health of School Children Exposed to Rail Yard–Generated  
445 Air Pollution: The ENRRICH Study. *J Environ Health* 2016; 78:8.
  - 446 13. Graveland H, Van Roosbroeck SA, Rensen WM, Brunekreef B, Gehring U. Air pollution  
447 and exhaled nitric oxide in Dutch schoolchildren. *Occup Environ Med* 2010.
  - 448 14. Liu C, Flexeder C, Fuertes E, Cyrus J, Bauer C-P, Koletzko S, et al. Effects of air  
449 pollution on exhaled nitric oxide in children: Results from the GINIplus and LISApplus  
450 studies. *Int J Hyg Environ Health* 2014; 217:483-91.
  - 451 15. Yang A, Janssen NA, Brunekreef B, Cassee FR, Hoek G, Gehring U. Children's  
452 respiratory health and oxidative potential of PM<sub>2.5</sub>: the PIAMA birth cohort study.  
453 *Occup Environ Med* 2016; 73:154-60.



- 454 16. Berhane K, Zhang Y, Salam MT, Eckel SP, Linn WS, Rappaport EB, et al. Longitudinal  
455 effects of air pollution on exhaled nitric oxide: the Children's Health Study. *Occup*  
456 *Environ Med* 2014; 71:507-13.
- 457 17. McConnell R, Berhane K, Yao L, Jerrett M, Lurmann F, Gilliland F, et al. Traffic,  
458 susceptibility, and childhood asthma. *Environ Health Perspect* 2006; 114:766-72.
- 459 18. Linn WS, Rappaport EB, Berhane KT, Bastain TM, Salam MT, Gilliland FD. Extended  
460 exhaled nitric oxide analysis in field surveys of schoolchildren: a pilot test. *Pediatr*  
461 *Pulmonol* 2009; 44:1033-42.
- 462 19. Linn WS, Rappaport EB, Eckel SP, Berhane KT, Zhang Y, Salam MT, et al. Multiple-  
463 Flow Exhaled Nitric Oxide, Allergy, and Asthma in a Population of Older Children.  
464 *Pediatr Pulmonol* 2013.
- 465 20. Islam T, Urman R, Gauderman WJ, Milam J, Lurmann F, Shankardass K, et al. Parental  
466 stress increases the detrimental effect of traffic exposure on children's lung function. *Am*  
467 *J Respir Crit Care Med* 2011; 184:822-7.
- 468 21. 2009. CfDCaPCASpftCgc. A SAS program for the CDC growth charts. . 2009.
- 469 22. Team RDC. R: a language and environment for statistical computing. R Foundation for  
470 Statistical Computing, Vienna, Austria. 2014.
- 471 23. Garcia-Marcos P, Soriano-Pérez M, Perez-Fernández V, Valverde-Molina J. Exhaled  
472 nitric oxide in school children: Searching for the lost variability. *Allergol immunopathol*  
473 2016; 44:206-13.
- 474 24. Silkoff P, Laviolette M, Singh D, FitzGerald J, Kelsen S, Backer V, et al. Longitudinal  
475 stability of asthma characteristics and biomarkers from the Airways Disease Endotyping  
476 for Personalized Therapeutics (ADEPT) study. *Respir Res* 2016; 17:43.
- 477 25. De Prins S, Dons E, Van Poppel M, Panis LI, Van de Mierop E, Nelen V, et al. Airway  
478 oxidative stress and inflammation markers in exhaled breath from children are linked  
479 with exposure to black carbon. *Environ Int* 2014; 73:440-6.
- 480 26. Enders CK, Tofighi D. Centering predictor variables in cross-sectional multilevel models:  
481 a new look at an old issue. *Psychological methods* 2007; 12:121.
- 482 27. Holguin F, Flores S, Ross Z, Cortez M, Molina M, Molina L, et al. Traffic-related  
483 exposures, airway function, inflammation, and respiratory symptoms in children. *Am J*  
484 *Respir Crit Care Med* 2007; 176:1236-42.
- 485 28. Adar SD, D'Souza J, Sheppard L, Kaufman JD, Hallstrand TS, Davey ME, et al.  
486 Adopting clean fuels and technologies on school buses. *Pollution and health impacts in*  
487 *children. Am J Respir Crit Care Med* 2015; 191:1413-21.
- 488 29. Lin W, Huang W, Zhu T, Hu M, Brunekreef B, Zhang Y, et al. Acute respiratory  
489 inflammation in children and black carbon in ambient air before and during the 2008  
490 Beijing Olympics. *Environ Health Perspect* 2011; 119:1507.
- 491 30. Hao Y, Zhang G, Han B, Xu X, Feng N, Li Y, et al. Prospective evaluation of respiratory  
492 health benefits from reduced exposure to airborne particulate matter. *Int J Environ Health*  
493 *Res* 2017; 27:126-35.
- 494 31. Renzetti G, Silvestre G, D'Amario C, Bottini E, Gloria-Bottini F, Bottini N, et al. Less air  
495 pollution leads to rapid reduction of airway inflammation and improved airway function  
496 in asthmatic children. *Pediatrics* 2009; 123:1051-8.
- 497 32. Clougherty JE. A growing role for gender analysis in air pollution epidemiology.  
498 *Environmental health perspectives* 2009; 118:167-76.

- 499 33. Linn WS, Berhane KT, Rappaport EB, Bastain TM, Avol EL, Gilliland FD. Relationships  
500 of online exhaled, offline exhaled, and ambient nitric oxide in an epidemiologic survey of  
501 schoolchildren. *J Expo Sci Environ Epidemiol* 2009; 19:674-81.
- 502 34. Gauderman WJ, Urman R, Avol E, Berhane K, McConnell R, Rappaport E, et al.  
503 Association of improved air quality with lung development in children. *N Engl J Med*  
504 2015; 372:905-13.
- 505 35. Berhane K, Chang C-C, McConnell R, Gauderman WJ, Avol E, Rappaport E, et al.  
506 Association of changes in air quality with bronchitic symptoms in children in California,  
507 1993-2012. *JAMA* 2016; 315:1491-501.
- 508 36. Garcia E, Berhane KT, Islam T, McConnell R, Urman R, Chen Z, et al. Association of  
509 changes in air quality with incident asthma in children in California, 1993-2014. *Jama*  
510 2019; 321:1906-15.
